# Supplementary material
Source: Springer Nature journal article supplement (https://www.springermedizin.de/resource/supplementary/12936_2007_550_MOESM1_ESM.pdf/9548266)

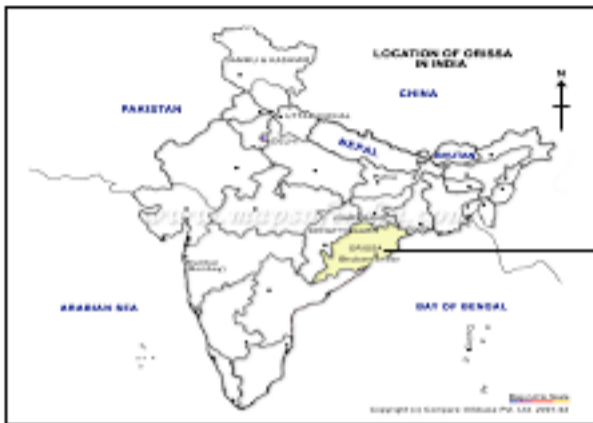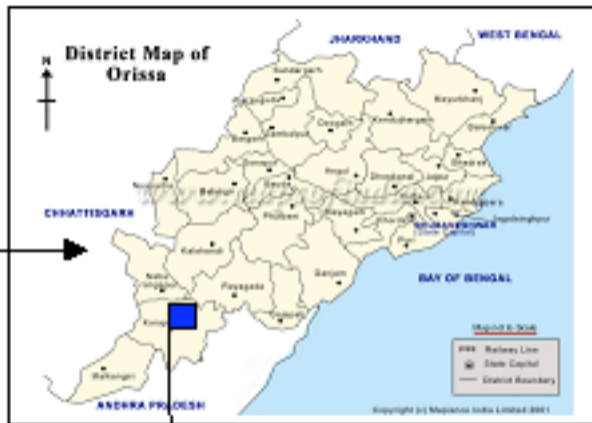

Study area

Supplement: MOESM1 [file 9548266]
